# Supplementary material for: A Controlled-Release Nanofertilizer Improves Tomato Growth and Minimizes Nitrogen Consumption
Source: MDPI journal article supplement (doi:10.3390/plants12101978), 2023-05-15
Supplement: s1 [file s1]

### Supplementary figure

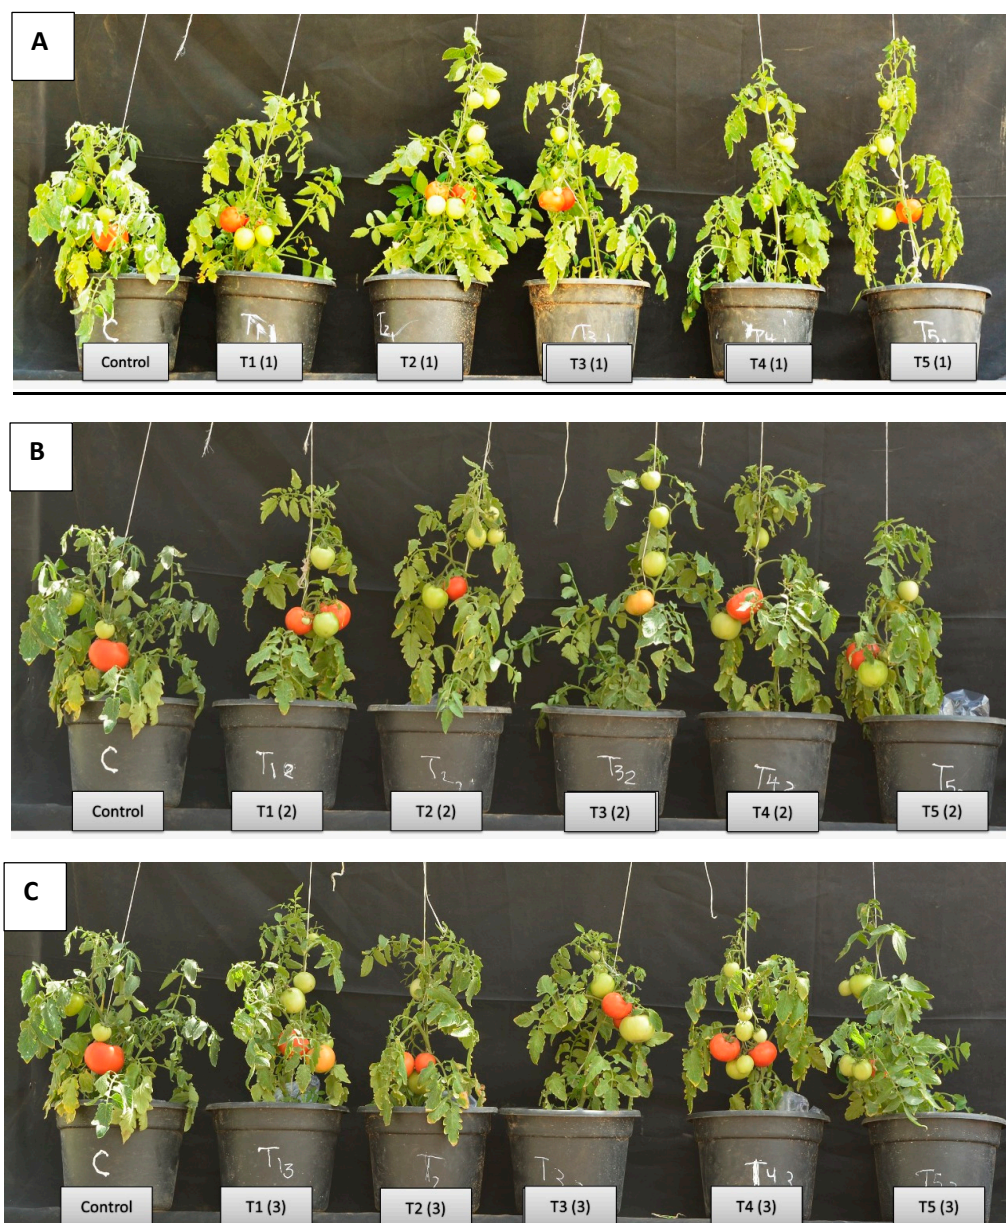

**Figure S1.** Tomato plants at the harvest stage of control and the five CRU treatments at N applied level of 25 (A), 50 (B), and 100%(C) of the recommended dose.
